# Supplementary material for: Natural Inhibitors Targeting the Localization of Lipoprotein System in Vibrio parahaemolyticus
Source: MDPI journal article supplement (doi:10.3390/ijms232214352), 2022-11-18
Supplement: s1 [file s1]

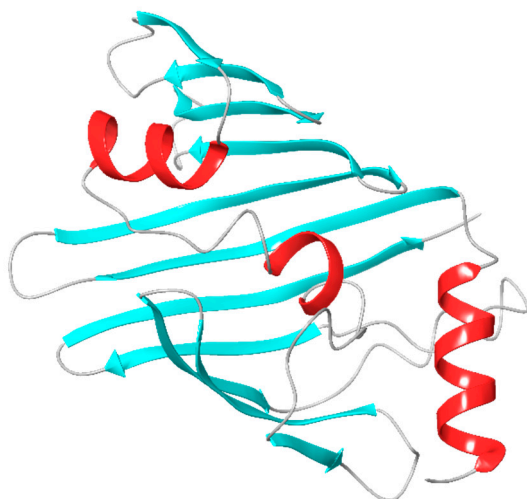

**Figure S1.** Homology model of *V. parahaemolyticus* LolB protein.  $\alpha$ -helixes and  $\beta$ -strands are shown as red and blue.

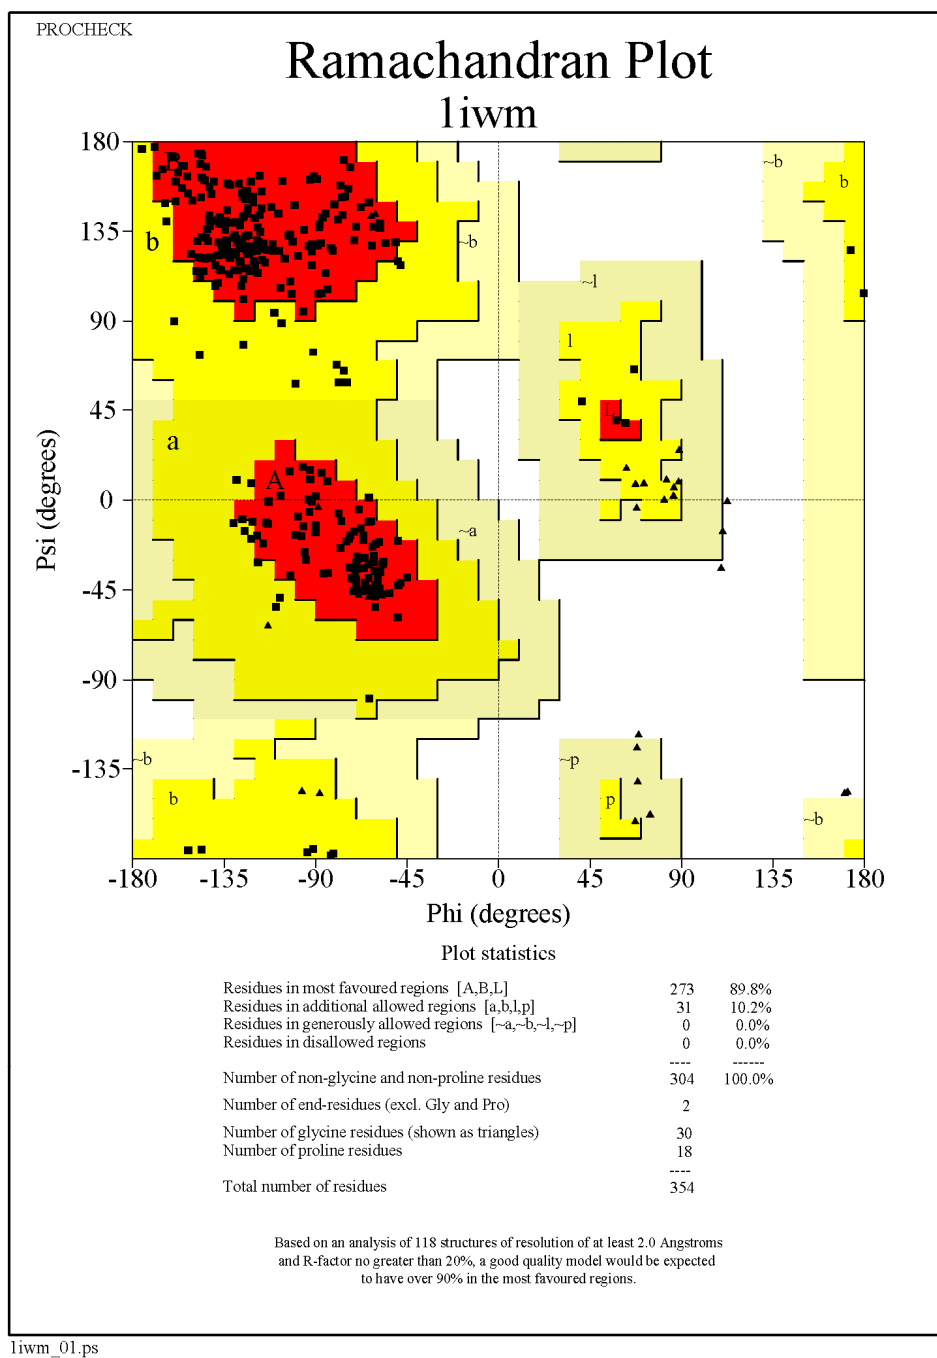

**Figure S2.** Ramachandran Plot of *V. parahaemolyticus* LolB model.
